# Supplementary material for: Measurement report: Characterization of uncertainties of fluxes andfuel sulfur content from ship emissions at the Baltic Sea
Source: Copernicus journal article supplement (doi:10.5194/acp-2020-1086), 2021-01-15
Supplement: Supplementary file [file acp-2020-1086-AC2-supplement.pdf]

## Reply to Reviewers

We thank the reviewers for their critical, valuable and constructive comments. We have made a major revision and replied to all the comments. Our answers below are written by **blue color**. The changes made in the manuscript are written below by **red color**, and highlighted in the manuscript by yellow color. The manuscript was significantly improved.

## Referee 2

### General

The paper by Walden et al. focuses on flux measurement uncertainties and sulfur content from ship emissions. The measurements are conducted by gradient method for selected trace gas pollutants and supplemented by eddy covariance measurements of CO<sub>2</sub> from a 9 m mast located at a coastal site and on a research vessel 2 km SSW into the sea. Quantifying emission rates from moving ships is certainly not trivial and the number of challenges encountered by the authors is simply impressive. While the paper shows a large effort in conducting the measurements, at least in this version, I would have reservations to the data interpretations and whether they can fully capture ship emissions using the presented approach. The major result from the paper are measured FSCs from the ships all of which did not exceed the EC regulation limit. Overall, I found this paper interesting for the focus on ship emissions, but there are inconsistencies in the data and the paper shows a high potential for further analysis and more coherent presentation of the results.

### Major comments

1. The major question is how well the assumptions of the gradient and EC methods worked for this heterogeneous coastal site. If the large short-term episode (e.g. in SO<sub>2</sub> or CO<sub>2</sub>) occupies only a fraction of the flux integration period, the episodic/spike data would most likely make it nonstationary regardless of whether other micrometeorological variables were stationary or not. The stationarity test should be conducted on each flux tracer including the CO<sub>2</sub> data.

The stationary test according to Foken and Wichura (*Agriculture and Forest Meteorology* 78, 1996, 83 – 105) was calculated and presented in the text. See also clarification in the Referee 1 at this point.

2. The gradient method also requires accurate measurements at two different heights. If the systematic offset between the instruments (SI Figure S1) was not corrected for, it would lead to large errors in calculated vertical GR fluxes. It is unclear how the data in Fig. S1 were used to correct/cross-calibrate the instruments when the correlation slope differs from 1.

We calibrated the instruments for gaseous compounds according to practice used at the FMI calibration laboratory. In addition the remaining offsets were removed at the measurement site by introducing a common sample through the sampling line to all instruments. In case of particle instruments (ELPIs) cross calibration was obtained by the use of the HEPA-filter for adjusting the zero level and by common samples at the same height at actual particle concentrations. The number concentration of particles smaller than 1 μm (N<sub>tot</sub>) from the ELPI2 was corrected with respect to the ELPI1. The text was clarified and reformulated in Supplement, and unnecessary Fig. S1 was removed.

p 9, lines 268-271: Based on the parallel measurements of the ELPIs on 30.8.2011 and 2.9. 2011 correction factors were inferred for ELPI2, separately for each stage (dN/dlogDp), and for the number concentration of particles smaller than 1  $\mu\text{m}$  (Ntot) that was used for the flux calculations (more details in Supplement). All measured Ntot data from the ELPI2 were corrected accordingly.

Supplement: After the HEPA filtration tests and zero setting the same air sample was injected into both instruments at certain time frames and at different particle concentrations. The effective variance regression line between the two ELPI instruments (assuming that both instruments have the same statistical uncertainty) was used to correct the results of the ELPI2 with respect to the ELPI1. The correction coefficients were inferred for the 8 smallest stages of the ELPI2 (dN/dlogDp), and for the number concentration of particles smaller than 1  $\mu\text{m}$  (Ntot). Only the Ntot concentrations (not the size distributions) from ELPI2 were used in this study. The standard and expanded uncertainties of the instruments with respect to each other was then inferred from the scatter of the Ntot results from the ELPIs (Figs. 1h and 2h). All measured Ntot data from the ELPI2 were corrected accordingly.

3. In the GR method, the authors rely on the assumption that the eddy diffusivity for heat transfer is the same as that for gas mass transfer (e.g. L.81). This could lead to large uncertainties which should be calculated independently for each chemical species. The comparison of GR and EC sensible heat fluxes could have been relatively easy and a good start in comparing the EC and GR methods.

Assumption,  $K_{\text{heat}} = K_{\text{gas}}$  is general (Panofsky and Dutton, 1987). The sensible heat was calculated with both of the method and we present the results, see in figure and text in Referee 1.

4. It would have been great to see a more quantitative comparison for GR and EC methods for  $\text{CO}_2$  (and for heat). However, from Fig. 9 it is clear that the  $\text{CO}_2$  fluxes agreed rather poorly, where for example between 08/28 12 PM and 08/29 12 PM, the gradient data show all negative values while EC data are scattered in a broader range mostly positive values but often changing the flux sign. The relative difference between the methods for most of the measured period therefore largely exceeds the uncertainties stated in the abstract (25-36 % and 30-60 % for the GR and EC methods, respectively). For this reason, I am finding highly suspicious the exact same median value for GR and EC  $\text{CO}_2$  fluxes reported in Table 1. I agree with the comment of the other referee that the scatter plot would have reflected more clearly how both methods worked. If the agreement does not work well for  $\text{CO}_2$ , the question is why and whether the gradient flux method was valid for  $\text{SO}_2$  and other reported trace gases.

The Referee is correct and we found mistakes in our previous manuscript. We analyzed more carefully the data between 08/28 12 PM and 08/29 12 PM, and it turned out that the WPL correction for water vapor was fully responsible for the change of the sign from negative to positive values in case of  $\text{CO}_2$  fluxes by EC method. Regarding to the results of  $\text{CO}_2$  fluxes by GR method we found a mistake that was corrected in the present manuscript. We calculated the minimum concentration difference of  $\text{CO}_2$  in dry air which did not exceed the calculated uncertainty limit that can be detected with the used analyzers. This means that the fluxes of  $\text{CO}_2$  could not be calculated. In previous manuscript, the minimum concentration difference was calculated only for wet condition and exceedances for the uncertainty limit occurred more frequently. Therefore, we removed Fig 9a and replaced it with a new figure including only the flux results of  $\text{CO}_2$  by EC method.

Table 1 was corrected.

In case of applying the scatter plot between the results of  $\text{CO}_2$  by GR and EC method, see our respond to the Referee 1 at this point.

5. The flux footprint contribution does not seem to be discussed. The data could give a completely different picture if the ship was outside the footprint (depositing fluxes to the site expected) compared to when the ship would be inside the footprint (emission fluxes expected). It is therefore challenging to attribute any enhancement to the ships without the knowledge of what the footprint was and how it was changing.

Text on the analysis of the footprint was added in the text. An example of analysis of the footprint is presented in Fig. 8a and b.

P 13, lines 379-388: The footprint area i.e. the area along the upwind where the exchange of gases and particles between the air-sea surface are expected to be a source of the measurement results, was calculated according to Högström et al. (2008). The footprint area was calculated at each of the measured height at stable, neutral and unstable conditions. Fig. 8a illustrates the relative intensity of the footprint area in neutral conditions as a function of upwind distance from the measurement mast at instrument heights of 4.7 m, 7.2 m and 10.7 m. The cumulative relative contribution (Fig. 8b) indicates that at the lowest height (4.7 m) less than 0.3 % of the observed flux takes place at the distance of 20 m from the mast reaching 90 % at a distance of 3 km. At the height of 10.7 m, the footprint area starts at 40 m from the mast reaching 85 % at distance of 3 km.

6. Given the moving point source within likely changing footprint (not uniform at the two heights) I am not convinced that the chosen approach was optimal for quantifying emission rates from ships. There are other methods such as wavelet analysis which could be more appropriate to measure intermittent or short-term emission episodes (e.g. Steiner et al., 2011; Misztal et al., 2014) which are not dependent on stationarity criteria.

We analyzed the transport and dispersion of a ship plume using the data from the emission measurement conducted at know regular cruising ships between Helsinki and Stockholm and applying the dispersion models. In Fig 10 a schematic layout on the dispersion of the ship emission (a) and an example of the transport and dispersion of the ship emission at known condition at August 28 with different time steps reaching the footprint area is presented (b).

7. I could not find it in the main text and SI, so I am curious if the data were subjected to coordinate rotation and how close to zero was the average vertical wind speed  $w$ ? A small tilt of the sonic anemometer could greatly skew the flux data.

The coordinate correction for the vertical wind speed,  $w$  was corrected in the Sonic signal during the calculation. In the direction to open sea, the wind angle was tilted  $8 \pm 6$  Degree.

8. There is no mention about how the lag time was derived for each integration period or if a constant value was used. I am particularly concerned about the potentially incorrect lag time because the CO<sub>2</sub> flux was changing sign from one period to the other like, for example, from 28 to 30 Aug (Fig. 9a). It would be great to see how a peak in the covariance function looked like and if the lag time was stable.

The synchronization for the signal from Licor and the sonic wind speed was corrected during the measurements. The lag time was monitored over the measurement campaign. The change of sign during the period from 28 to 30 Aug was analyzed more carefully and as mentioned at Q4, the correction of water vapor was mainly responsible for the change of sign. This can be demonstrated according to:

According to Webb et al. (1980) the covariance term ( $w's'$ ) can be expressed as

$$w's' = (M_c/M_a)[w'CO_{2,w}'/(1 - H_2O) + w'H_2O' \cdot CO_2/(1-H_2O)^2]$$

where  $M_c$  and  $M_a$  are the mole mass of  $\text{CO}_2$  and dry air,  $w'\text{CO}_{2,w}$  is the raw  $\text{CO}_2$  flux in ( $\text{ppm m s}^{-1}$ ),  $\text{H}_2\text{O}$  is the water content in ( $\text{mmol mol}^{-1}$ ),  $w'\text{H}_2\text{O}$  is the raw water flux ( $\text{mmol mol}^{-1} \text{ m s}^{-1}$ ) and  $\text{CO}_2$  is the concentration (wet). We divide the correction into two terms on the right side, terms 1 and 2 as well as their sum 1+2, shown in the Fig.2a. The raw flux of  $\text{CO}_2$  ( $= w'\text{CO}_2$ ) and the WPL-corrected  $w$ 's' ( $= \text{WPL } 1 + 2$  terms) on the right, Fig 2b.

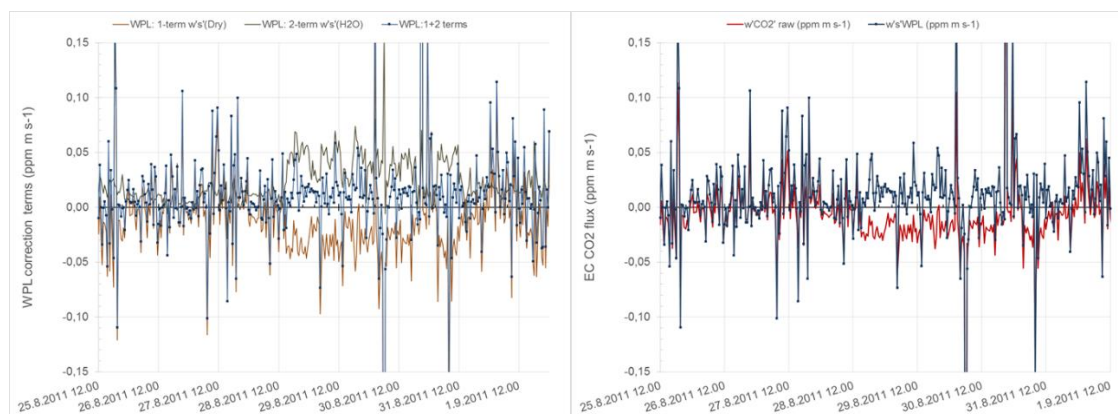

Fig 2. The WPL correction presented in two term and their sum (a) and for comparison the raw  $\text{CO}_2$  flux and the WPL correction (b).

- The data quality control is not presented clearly. It would be great to know what criteria were used and which data were actually rejected. For instance, Figures 8 and 9 show the data for when M-O theory was not fulfilled. If it is important to show these low-quality data they could be shown in grey so it is clear that they were rejected and are not distracting from observing potentially good data.

A text for describing the QA/QC procedures was added into the text, see the comments by the Referee 1. We changes Figs 8 and 9 accordingly.

- Conclusions lack the main take-home messages. Practically entire conclusions are spent on emphasizing high uncertainties and challenges and not pointing out the main results or findings. Was the goal to say that the methods did not work at all or that they might potentially work with some improvements? Including the major findings based on the valid data (FSCs?) and further analysis of the remaining data (especially  $\text{NO}_x$ ) could significantly improve the manuscript.

Section Conclusions was rewritten.

### Specific comments

- What inlet was used for sampling ultra fine particles?

The following information was added.

p 9, line 240: For particle sampling stainless steel tubes with an outer diameter of 12 mm were used.

- SI Figure S2 shows how uncertainty increases closer to the detection limit which is a nice demonstration. However, it is unclear how the data below the detection limit were treated. I suggest to consult Helsel (1990).

The average concentration of 30 min for SO<sub>2</sub> and NO were mostly close to or below the detection limit, and we should not conduct any calculations (subtraction) with this kind of data. Therefore we discarded the results shown in Figs. S2a,d (now Fig. S1 a,d). (Tarkemmin ajatellen näin pitäisi tehdä. En suosi, että muutetaan arvot alle DL:n esimerkiksi DL/2 ja lasketaan sitten erotuksia tms.) In case of other gases concentrations were above the DL, especially in case of O<sub>3</sub> and CO<sub>2</sub>. Calculations for fluxes were conducted if the difference in concentrations between the sampling heights exceeded the uncertainty limit, i.e. repeatability (see definition e.g. by EN 14211) of instruments at the measured concentration.

12. What was the message the multipanel Figure S3 was meant to come across? Is it suggested that the absolute uncertainties exceeded almost all the data values? It could perhaps be clearer to show the relative uncertainties as shaded areas.

If the concentration difference between the two heights was less than the repeatability of the instruments at that concentration, the results were discarded. Unfortunately, this was the case for most of the time for all gases. Only the concentration differences for N<sub>tot</sub> exceeded clearly the uncertainty limit enabling the calculation of the N<sub>tot</sub> fluxes by the GR method. Fig. S3, now Fig. S2, was improved as suggested by the Referee.

13. In the uncertainty budget, I would suggest the authors describe the systematic and random errors as well as the treatment of data below the detection limit. It is unclear if the data have been corrected for the systematic error.

Calibration of the response of instruments and the cross-calibration due to sampling were systematic errors and corrected. Instead, the variation for temperature, pressure and humidity in the atmosphere influencing on the respond of the instruments were treated as random errors and included into the uncertainty budget (shown Fig. S2, now Fig. S1). We included a clarification for the text in case of how the data were corrected for systematic errors, eqs. 11-13 and Table S1. We added in eq. 12 the standard uncertainty for wind speed. Additionally, we also considered the statistical error of an EC estimate.

p. 7, lines 180-183: The uncertainty sources that contribute to the uncertainty of the flux results by the GR method are systematic and random in nature. Calibration of the response of all instruments, correction of the humidity for CO<sub>2</sub> analyzers and cross-calibration due to sampling tubes of the analyzers are systematic errors. All the uncertainty sources (systematic and random) that contribute to the results need to be corrected.

p. 13, lines 393-399: The uncertainty sources of the measurement results for fluxes by the gradient method are presented in more detail in Supplementary Table S1. To estimate the uncertainty of the momentum flux and CO<sub>2</sub> flux measurements by the EC method we calculated the expected statistical variability using the Co-spectrum. For the momentum flux it was 20 %, and for the CO<sub>2</sub>-flux 30 %. This wide uncertainty range is typical in real meteorological situations and explains the scatter of the EC estimates in e.g. Fig. 12. The analysis of uncertainty follows the guideline provided by the Joint Committee for Guides in Metrology (JCGM, 2008). Based on the analysis, the relative expanded uncertainties for the flux measurements of CO<sub>2</sub> and nanoparticles are presented in Table 1 at stationary meteorological conditions.

14. Eq. 10, the value of the 0.232 multiplier seems somewhat off when using the emission factor from Petzold et al. Was a different EF value used instead?

We have used EF<sub>CO<sub>2</sub></sub> = 3107 g/(kg fuel) from Petzold and Equation (4) from Pirjola et al., 2014. The coefficient should be 0.226 ~ 0.23. This value was used for the FSC calculations. Equation (10) was corrected accordingly.

15. Figure 1, poor resolution, I could not read the text.



The resolution of Figure 1 was improved.

16. Figure 3, panel a) low resolution CFD figure, I could not read the legend. It would be useful to add in the text how exactly CFD was used to correct the data and if it was a constant or time-dependent correction.

We clarified the text and figure caption. Also the resolution of Fig. 3a was improved.

p. 11, lines 309-314: The airflow around the shoreline and the measuring structure was modelled using steady, incompressible, single-phase potential flow. The simulation covered a 80 m long, 40 m wide and 30 m high rectangular box around the measurement area. Fig. 3a illustrates the calculated wind field isopleths at a wind speed of 9 m/s over the open sea area, and it shows how the flow field is disturbed around the measurement mast. Based on the calculated isopleths we determined for each measurement height the corresponding height over the open sea. The actual wind speed probe heights are shown at the measurement mast on the right and their projected heights over open sea on the left.

Figure 3. a) The actual measurement heights were reduced to corresponding heights over the open sea surface utilizing calculated isopleths from flow dynamics program. The actual wind speed probe heights at the measurement mast are shown on the right and their projected heights over open sea on the left.

17. Figure 5, these trajectories show long-range transport. Can these be zoomed to the measurement site?

Unfortunately, we were not able to zoom the trajectories to the measurement site. However, as seen from Fig. 1 the Harmaja island is close to the center of Helsinki, around 6 km.

18. Figure S1. Make x and y axes consistent. Show the 1:1 line. Were these data used to correct the instruments? How?

This figure was removed since the size distribution data from ELPI2 was not used in this study. For the flux calculations we only needed the corrected  $N_{tot}$  concentrations.

19. I am surprised that the uncertainty is shown in Table S1 for the nonstationary periods as I do not think it is meaningful. The nonstationary periods should have been rejected. Did the CFD calculation correct only for the horizontal wind speed?

The Referee is right. The nonstationary periods were rejected. In the CFD calculations the vertical wind speed is constant.

20. What was the frequency distribution of  $CO_2$  fluxes (FFT spectrum)? As the flux data collection was conducted only at 1 Hz (L. 275), were the data corrected for high frequency losses?

The data were corrected at 10 Hz frequency. In the early version, there was a mistake which was now corrected.

#### **Other corrections and changes made to manuscript:**

- p. 1 line 12-14: Fluxes of gaseous compounds and nanoparticles were studied by micrometeorological methods at Harmaja in the Baltic Sea. The measurement site situated by the ship route to and from the city of Helsinki

- p. 1, line20 – 21. No clear fluxes across the air-sea nor sea-air interface were observed for SO<sub>2</sub>, NO, NO<sub>2</sub>, NO<sub>x</sub> (= NO + NO<sub>2</sub>), O<sub>3</sub>, and CO<sub>2</sub> by the GR method.
- p. 2, lines38 – 39: In the Baltic Sea few measurement facilities to measure the gas exchange between the sea-air interface by micrometeorological methods has been set up (Smedman et al. 1999, Honkanen et al. 2018).
- p. 2, lines47 – 49: The goal of this study was (i) to measure the gas and nanoparticle exchange between the sea-air interface in marine coastal environment close to the ship routes, (ii) to study the transport and dispersion of the ship plume to the footprint area, (iii) to define the FSC from the ship emission plumes and (iv) to characterise the uncertainty sources of the measurement results.
- p. 3, lines 83 – 84: where  $F_c$  is the flux of the scalar quantity  $c$ ,  $K_c$  is the eddy diffusivity of  $c$ ;  $c$  means here the gas compounds and particles. The gradient  $\partial c/\partial z$  describes the mean concentration of  $c$  in the vertical direction  $z$
- p. 5, lines 133 – 135: where  $\rho_a$  is the density of dry air, and  $c'$  is the measured molar fraction of CO<sub>2</sub> ( $\mu\text{mol mol}^{-1}$ ). The commonly used infra-red analyzers measure the concentration of CO<sub>2</sub> in air normally in wet condition unless an air drier is used in the sampling tube. The widely used method to correct the fluctuations of water vapour and heat is the so called WPL method proposed by Webb et al. (1980), which is applied in this study.
- p.13, lines 389 – 390: Cross sensitivity of the compounds (e.g. water vapour) on the response of the used analyzers are included into the uncertainty budget or corrected directly on the results, see in Fig. S1.
- p.13, lines 393 – 399: The uncertainty sources of the measurement results for fluxes by the gradient method are presented in more detail in Supplementary Table S1. To estimate the uncertainty of the momentum flux and CO<sub>2</sub> flux measurements by the EC method we calculated the expected statistical variability using the Co-spectrum. For the momentum flux it was 20 %, and for the CO<sub>2</sub>-flux 30 %. This wide uncertainty range is typical in real meteorological situations and explains the scatter of the EC estimates in e.g. Fig. 12. The analysis of uncertainty follows the guideline provided by the Joint Committee for Guides in Metrology (JCGM, 2008). Based on the analysis, the relative expanded uncertainties for the flux measurements of CO<sub>2</sub> and nanoparticles are presented in Table 1 at stationary meteorological conditions.
- p. 14, lines 404 – 407: Wind speed and friction velocity in Fig. 9c show a clear dependence on the wind direction. A linear relationship between the average wind speed and the friction velocity is seen in the sectors where the wind arrives over an open sea area, whereas non-linear behaviour is seen towards the northern sector (345° to 45°), where there are more obstacles.
- p. 14, lines: 409 – 419: Dispersion of a ship plume is schematically presented in Fig. 10a. The black curves cover the area of the pollutants' dispersion, where the upper line is limited by the boundary layer while the lower curve hits the sea surface forming a new boundary layer. The fluxes from the ship can be measured if the measurement instrument is inside the new boundary layer where the footprint area exists. As an example, Fig. 10b illustrates the momentary plumes at the sea surface for a ship operating to the city of Helsinki and passing Harmaja Island with a speed of 21.5 kn ( $\sim 11 \text{ m s}^{-1}$ ). The arrows show how the apparent plume is generated in the (u,v)-coordinate system, and where the pollutants transporting to the footprint area come from. The wind speed was  $11 \text{ m s}^{-1}$  and wind direction 210° as in the afternoon and evening of 28 August (Fig. 4c). The momentary plume figures are shown after 15, 23, 30 and 37 min the start, and the plume concentration gradients decrease as the plume moves further. At the footprint area the gradient is really small indicating horizontally homogeneous situation. If additionally, the stationary criteria for heat, water vapour and momentum are valid, the momentary vertical gradients give the momentary flux.

- p. 15, lines 428 – 434: The fluxes of CO<sub>2</sub> (EC) and N<sub>tot</sub> (GR) are presented as a function of wind direction in Fig. 11a. The fluxes were averaged over the wind sectors of 10 degrees, but no other restrictions included. Fig. 11b illustrates the time series for the CO<sub>2</sub> flux by the EC method, and Fig. 11c for the N<sub>tot</sub> flux by the GR method along with the uncertainties. Only the fluxes that fulfilled the stationary criteria with no swell in the wind sector of 150-270 degrees were taken into account. It can be observed from Fig. 11a that the CO<sub>2</sub> fluxes show only a weak dependence on the wind direction except in the northern sector due to the city of Helsinki (see also Fig. 7), whereas the negative N<sub>tot</sub> fluxes appear on the wind sectors containing ship routes (150-270°).
- p. 15, lines 435 – 445: The WPL-correction to the CO<sub>2</sub> flux by the EC method corrects wet air into the dry air and for water flux. Due to the damping of temperature fluctuations in the long sample tube the WPL correction for heat flux was insignificant (Rannik et al. 1997). During the period when the air masses were moving from the Atlantic (during 28.8 to 31.8), the correction due to water flux was dominating and caused a positive offset to the CO<sub>2</sub> flux. The observed CO<sub>2</sub> fluxes are also in line with the previous measurements (Honkanen et al. 2018) at the Utö island in the Baltic Sea.
- p. 15, 454 – 455: 12a. The sensible heat fluxes (Fig. 12c) were calculated by the EC method in 2012 campaign at Harmaja and at two heights (10 m and 16 m above the sea level) at R/V Aranda showing good agreement with each other.
- p. 15, lines: Discrepancies between the measurement results by the GR and EC methods have been reported in the literature (Mycklebust et al. 2008, Muller et al. 2009) for CO<sub>2</sub> and for O<sub>3</sub>, but no systematic reason has been found.
- p. 17, lines 498 – 513: Flux measurements in marine environment are challenging due to meteorological conditions and topographical aspects. Filtering of data outside the footprint area and for certain wind sector, occurrence of swell, non-stationarity, and the concentration difference between the measurement heights lower than the uncertainty limit reduces the number of available data considerably. In this study, fluxes of 43 % for N<sub>tot</sub> by the GR method and 28 % for CO<sub>2</sub> by the EC method of all measurement results were acceptable.

It became quite clear that no direct gas exchange across the air-sea interface, negative or positive fluxes, could be measured by the GR method. Mostly because the capability of the used analyzers to measure the gas concentration differences under clean coastal conditions was not sufficient. Even though the CO<sub>2</sub> flux was too small to be detected with the GR method, it could be detected by the EC method. The case was different for nanoparticles where the observed differences of the number concentration were well above the uncertainty limit for the both ELPs.

Both of the GR and EC methods were capable for measuring the emissions from the ships. Much effort was laid down on studying the transport and dispersion of single ship emissions. Different scenarios depending on the wind speed and wind direction were able to identify: (i) pollutants have reached the footprint area and the measurement mast (ii) the pollutants are bypassed the footprint area but caught by the measurement mast. When the mixing of the pollutants occurred well before the footprint area for the measurement mast the measured fluxes were real. When the mixing of the pollutants from the ships was not complete, violation of the M-O theory occurred and the measurement results described dispersion of the pollutants

### Revised figures:

p. 23. New Fig 1.

p. 31. New Fig 8. a) Flux footprint areas at neutral stability seen by the CO<sub>2</sub> instruments at 10.7 and 7.2 altitudes, and by the ELPs at 7.2 and 4.7 m altitudes. X-axis refers to the upwind distance from the instruments, and the colour bar to the relative intensity of the sea surface area to the flux. Figure b) shows the cumulative relative contribution



p. 32 Fig 8 number changed into Fig 9.

p. 34, lines 762 – 767: Figure 11. a) Fluxes of CO<sub>2</sub> by the EC method and N<sub>tot</sub> by the GR method are presented as a function of wind direction. No criteria has been included. Time series of 30 min fluxes for CO<sub>2</sub> (□mol m<sup>-2</sup> s<sup>-1</sup>) by the EC methods (b) in all wave conditions (codes 1 to 3), and N<sub>tot</sub> (cm<sup>-3</sup> m s<sup>-1</sup>) by the GR method (c) with no swell (codes 1-2), along with the uncertainties. The data in (b) and (c) include only events in the wind sector between 150° and 270° and with the stationary criteria based on the momentum flux for N<sub>tot</sub> and the CO<sub>2</sub> flux for CO<sub>2</sub>. d) Time series of the 30 min fluxes of N<sub>tot</sub> by the GR method in the wind direction of 150-270 °. Additionally, the fluxes of ship peaks are shown separately. e) The same as d) but for CO<sub>2</sub> fluxes.

p.35 lines 771 – 774: New number of Fig 12. a) Time series of CO<sub>2</sub> fluxes by the EC methods in 2012 at Harmaja and at the R/V Aranda in the wind direction of 150-270°. b) Partial pressure of CO<sub>2</sub> in the seawater from R/V Aranda, and CO<sub>2</sub> concentrations in the atmosphere at Harmaja and at the urban background monitoring station SMEAR III in Kumpula, Helsinki. c) Time series of sensible heat fluxes measured by the EC method at Aranda at 16 and 10 m altitudes and in Harmaja at 6.6 m altitude.

p. 36, line 786: New number Fig 13.

p. 37, line 791: New number Fig 14.

## References added in

- p. 19, lines 568-569: Foken, T, Wichura, B. Tools for quality assessment of surface-based flux measurements. *Agric. Forest Meteorol.* 78, 83 – 105, 1996
- p. 19, lines 580 – 581: Honkanen M., Tuovinen J-P., Laurila T., Mäkelä T., Hatakka J., Kielosto S., Laakso L. Measuring turbulent CO<sub>2</sub> fluxes with closed-path gas analyzer in marine environment. *Atmos. Meas. Tech.* 11, 5335 – 5350, 2018.
- p. 20, lines 616 – 617: Mahrt, L., Sun, J., Blumen, W., Delany, A.C, Oncley S. Nocturnal Boundary-Layer Regimes. *Boundary-Layer Meteorology* 88, 255 – 278, 1998.
- p. 20, lines 625 – 628: Muller J. B. A., Coyle M., Fowler D., Gallagher M., Nemitz E. G., Persival C. J. Comparison of ozone fluxes over grassland by gradient and eddy covariance technique. *Atmos. Sci. Lett.* 10, 164 – 169, 2009.
- p. 20, lines 627-629: Myklebust M. C., Hipps L. E., Ryel R. J. Comparison of eddy covariance, chamber, and gradient methods of measuring soil CO<sub>2</sub> efflux in an annual semi-arid grass, *Bromus tectorum*. *Agric. For. Meteorol.* 148, 1894 – 1907, 2008.
- p. 21, lines 641 – 642: Rannik, U., Vesala, T., and Keskinen, R. On the damping of temperature fluctuations in a circular tube relevant to the eddy covariance measurement technique. *J. Geophys. Res.* 102, 12789 – 12794, 1997.

## Other References

Helsel, D.R.: Less than obvious-statistical treatment of data below the detection limit. *Environmental science & technology*, 24(12), pp.1766-1774, 1990.

Misztal, P. K., Karl, T., Weber, R., Jonsson, H. H., Guenther, A. B., and Goldstein, A. H.: Airborne flux measurements of biogenic isoprene over California, *Atmos. Chem. Phys.*, 14, 10631–10647, <https://doi.org/10.5194/acp-14-10631-2014>, 2014.

Steiner, A. L., Pressley, S. N., Botros, A., Jones, E., Chung, S. H., and Edburg, S. L.: Analysis of coherent structures and atmosphere-canopy coupling strength during the CABINEX field campaign, *Atmos. Chem. Phys.*, 11, 11921–11936, <https://doi.org/10.5194/acp-11-11921-2011>, 2011.

Foken, T., Wichura, B. Tools for quality assessment of surface-based flux measurements. *Agric. Forest Meteorol.* 78, 83 – 105, 1996.

Panofsky, H. A., Dutton, J. A.: *Atmospheric turbulence - Models and methods for engineering applications*. John Wiley & Sons, Inc., New York, USA, 397 p, 1987.

Webb, E.K., Pearman, G. I., Leuning R.: Correction of flux measurements for density effects due to heat and water vapour transfer, *Quart. J. Met. Soc.*, 106, 85 – 100, 1980.
